# Supplementary material
Source: PubMed Central journal article supplement (PMC3756485)
Supplement: NIHMS506999-supplement-Supplementary_Table_1.pdf [file NIHMS506999-supplement-Supplementary_Table_1.pdf]

**Supplementary Table 1**

| compound                                                          | Transporter      | mean uptake $\pm$<br>SEM<br>(fmol/oocyte/60<br>min) | number of<br>oocytes | significantly<br>different than<br>H <sub>2</sub> O (p<0.01)? |
|-------------------------------------------------------------------|------------------|-----------------------------------------------------|----------------------|---------------------------------------------------------------|
| D-ribose                                                          | PfENT4           | 77 $\pm$ 6                                          | 24                   | no                                                            |
|                                                                   | PvENT4           | 85 $\pm$ 7                                          | 24                   | no                                                            |
|                                                                   | H <sub>2</sub> O | 73 $\pm$ 5                                          | 24                   |                                                               |
| adenine                                                           | PfENT4           | 981 $\pm$ 61                                        | 22                   | yes                                                           |
|                                                                   | PvENT4           | 1914 $\pm$ 79                                       | 22                   | yes                                                           |
|                                                                   | H <sub>2</sub> O | 436 $\pm$ 19                                        | 22                   |                                                               |
| adenosine                                                         | PfENT4           | 164 $\pm$ 13                                        | 22                   | yes                                                           |
|                                                                   | PvENT4           | 610 $\pm$ 34                                        | 22                   | yes                                                           |
|                                                                   | H <sub>2</sub> O | 53 $\pm$ 1                                          | 22                   |                                                               |
| 2'-deoxyadenosine                                                 | PfENT4           | 903 $\pm$ 55                                        | 38                   | yes                                                           |
|                                                                   | PvENT4           | 1212 $\pm$ 73                                       | 38                   | yes                                                           |
|                                                                   | H <sub>2</sub> O | 126 $\pm$ 23                                        | 38                   |                                                               |
| adenosine monophosphate (AMP)<br>(with 5' nucleotidase inhibitor) | PfENT4           | 21 $\pm$ 5                                          | 9                    | no                                                            |
|                                                                   | PvENT4           | 31 $\pm$ 3                                          | 9                    | no                                                            |
|                                                                   | H <sub>2</sub> O | 24 $\pm$ 5                                          | 9                    |                                                               |
| guanine                                                           | PfENT4           | 373 $\pm$ 28                                        | 18                   | no                                                            |
|                                                                   | PvENT4           | 588 $\pm$ 57                                        | 18                   | yes                                                           |
|                                                                   | H <sub>2</sub> O | 290 $\pm$ 29                                        | 18                   |                                                               |
| guanosine                                                         | PfENT4           | 136 $\pm$ 28                                        | 12                   | no                                                            |
|                                                                   | PvENT4           | 253 $\pm$ 44                                        | 12                   | yes                                                           |
|                                                                   | H <sub>2</sub> O | 64 $\pm$ 7                                          | 12                   |                                                               |
| 2'-deoxyguanosine                                                 | PfENT4           | 406 $\pm$ 64                                        | 18                   | yes                                                           |
|                                                                   | PvENT4           | 572 $\pm$ 72                                        | 18                   | yes                                                           |
|                                                                   | H <sub>2</sub> O | 181 $\pm$ 40                                        | 18                   |                                                               |
| hypoxanthine                                                      | PfENT4           | 455 $\pm$ 37                                        | 18                   | no                                                            |
|                                                                   | PvENT4           | 499 $\pm$ 27                                        | 18                   | no                                                            |
|                                                                   | H <sub>2</sub> O | 444 $\pm$ 38                                        | 18                   |                                                               |
| inosine                                                           | PfENT4           | 136 $\pm$ 11                                        | 18                   | yes                                                           |
|                                                                   | PvENT4           | 269 $\pm$ 17                                        | 18                   | yes                                                           |
|                                                                   | H <sub>2</sub> O | 84 $\pm$ 5                                          | 18                   |                                                               |
| xanthine                                                          | PfENT4           | 235 $\pm$ 17                                        | 14                   | yes                                                           |
|                                                                   | PvENT4           | 196 $\pm$ 15                                        | 14                   | no                                                            |
|                                                                   | H <sub>2</sub> O | 152 $\pm$ 12                                        | 14                   |                                                               |
| cytosine                                                          | PfENT4           | 84 $\pm$ 19                                         | 12                   | no                                                            |
|                                                                   | PvENT4           | 107 $\pm$ 25                                        | 12                   | no                                                            |
|                                                                   | H <sub>2</sub> O | 63 $\pm$ 24                                         | 11                   |                                                               |
| cytidine                                                          | PfENT4           | 44 $\pm$ 4                                          | 18                   | no                                                            |
|                                                                   | PvENT4           | 73 $\pm$ 5                                          | 18                   | yes                                                           |

|                  |                  |          |    |     |
|------------------|------------------|----------|----|-----|
|                  | H <sub>2</sub> O | 39 ± 5   | 17 |     |
| 2'-deoxycytidine | PfENT4           | 84 ± 5   | 14 | no  |
|                  | PvENT4           | 126 ± 10 | 14 | yes |
|                  | H <sub>2</sub> O | 63 ± 7   | 14 |     |
| thymine          | PfENT4           | 557 ± 32 | 18 | no  |
|                  | PvENT4           | 444 ± 18 | 18 | no  |
|                  | H <sub>2</sub> O | 532 ± 31 | 17 |     |
| thymidine        | PfENT4           | 199 ± 25 | 12 | yes |
|                  | PvENT4           | 177 ± 20 | 12 | yes |
|                  | H <sub>2</sub> O | 46 ± 5   | 11 |     |
| uracil           | PfENT4           | 393 ± 22 | 24 | no  |
|                  | PvENT4           | 302 ± 14 | 24 | yes |
|                  | H <sub>2</sub> O | 384 ± 30 | 24 |     |
| uridine          | PfENT4           | 97 ± 6   | 12 | no  |
|                  | PvENT4           | 133 ± 12 | 12 | yes |
|                  | H <sub>2</sub> O | 86 ± 7   | 12 |     |
